# Supplementary material for: Risk Factors for Prolonged Opioid Consumption in Lower Extremity Amputees
Source: PubMed Central journal article supplement — Plast Reconstr Surg Glob Open. 2022 Feb 18;10(2):e4026. doi: 10.1097/GOX.0000000000004026 (PMC8856592; doi:10.1097/gox.0000000000004026), 2022-02-18
Supplement: gox-10-e4026-s001.pdf [file gox-10-e4026-s001.pdf]

---

**Supplemental Table 1: Definitions**

|                                       | CPT or ICD-9 codes or USC codes                                                                                                                                                                                                                                          |
|---------------------------------------|--------------------------------------------------------------------------------------------------------------------------------------------------------------------------------------------------------------------------------------------------------------------------|
| <b>Conditions</b>                     |                                                                                                                                                                                                                                                                          |
| Lower Extremity Amputations           | CPT-27290, CPT-27590, CPT-27591, CPT-27592, CPT-27594, CPT-27596, CPT-27880, CPT-27881, CPT-27882, CPT-27884, CPT-27886, CPT-27888, CPT-28800, CPT-28805, CPT-28810, CPT-28820, CPT-28825                                                                                |
| <b>Medications</b>                    |                                                                                                                                                                                                                                                                          |
| Anticonvulsant Class                  | DRUG-CARBAMAZEPINE, DRUG-CARBAMAZEPINE_ER, DRUG-GABAPENTIN, DRUG-OXCARBAZEPINE, DRUG-LYRICA, DRUG-TOPIRAMATE, DRUG-TOPIRAMATE_ER, DRUG-TOPAMAX, DRUG-OXTELLAR_XR, DRUG-TRILEPTAL, DRUG-NEURONTIN, DRUG-TEGRETOL, DRUG-TEGRETOL_XR                                        |
| Antidepressant Class                  | USC-64310, USC-64320, USC-64330, USC-64340, USC-64350, USC-64360, USC-64380                                                                                                                                                                                              |
| Benzodiazepine Class                  | USC-64610                                                                                                                                                                                                                                                                |
| Methadone                             | DRUG-METHADONE_HCL                                                                                                                                                                                                                                                       |
| Muscle Relaxants                      | USC-59111, USC-59112, USC-59121                                                                                                                                                                                                                                          |
| Opioids                               | USC-02211, USC-02212, USC-02214, USC-02221, USC-02222, USC-02232                                                                                                                                                                                                         |
| <b>Comorbidities</b>                  |                                                                                                                                                                                                                                                                          |
| Asthma                                | ICD-9-D-49300, ICD-9-D-49399, ICD-10-D-J452: ICD-10-D-J45988                                                                                                                                                                                                             |
| Congestive Heart Failure              | CD-9-D-39891, ICD-9-D-4280, ICD-9-D-4281, ICD-9-D-42820, ICD-9-D-42821, ICD-9-D-42822, ICD-9-D-42823, ICD-9-D-42830, ICD-9-D-42831, ICD-9-D-42832, ICD-9-D-42833, ICD-9-D-42840, ICD-9-D-42841, ICD-9-D-42842, ICD-9-D-42843, ICD-9-D-4289, ICD-10-D-I150: ICD-10-D-I159 |
| Coronary Artery Disease               | ICD-9-D-4110: ICD-9-D-4149, ICD-10-D-I25: ICD-10-D-I259                                                                                                                                                                                                                  |
| Chronic Kidney Disease                | ICD-9-D-585, ICD-9-D-5851, ICD-9-D-5852, ICD-9-D-5853, ICD-9-D-5854, ICD-9-D-5855, ICD-9-D-5856, ICD-9-D-5859, ICD-9-D-7925, ICD-10-D-N18: ICD-10-D-N189                                                                                                                 |
| Chronic Obstructive Pulmonary Disease | ICD-9-D-490: ICD-9-D-49699, ICD-10-D-J44: ICD-10-DJ449                                                                                                                                                                                                                   |
| Diabetes Mellitus                     | ICD-9-D-24900: ICD-9-D-25099, ICD-9-D-7902, ICD-9-D-79021, ICD-9-D-79022, ICD-9-D-                                                                                                                                                                                       |

|                      |                                                                                                                                                                                                                                                                                                                                                                                                                                                                   |
|----------------------|-------------------------------------------------------------------------------------------------------------------------------------------------------------------------------------------------------------------------------------------------------------------------------------------------------------------------------------------------------------------------------------------------------------------------------------------------------------------|
| Hypertension         | 79029,ICD-9-D-7915,ICD-9-D-7916,ICD-10-D-E090:ICD-10-D-E139<br>ICD-9-D-4010:ICD-9-D-4059,ICD-10-D-I10:ICD-10-D-I159                                                                                                                                                                                                                                                                                                                                               |
| Obesity              | ICD-9-D-2780,ICD-9-D-27800,ICD-9-D-27801,ICD-9-D-27802,ICD-9-D-27803,ICD-10-D-E660:ICD-10-D-E669                                                                                                                                                                                                                                                                                                                                                                  |
| Osteoarthritis       | ICD-9-D-71500:ICD-9-D-71599,ICD-10-D-M1911:ICD-10-D-M1993                                                                                                                                                                                                                                                                                                                                                                                                         |
| Rheumatoid Arthritis | ICD-9-D-7140,ICD-9-D-7142,ICD-10-M0520:ICD-10-D-M061                                                                                                                                                                                                                                                                                                                                                                                                              |
| Tobacco use          | ICD-9-D-3051, ICD-9-D-V1582, ICD-10-D-Z720                                                                                                                                                                                                                                                                                                                                                                                                                        |
| <b>Risk Factors</b>  |                                                                                                                                                                                                                                                                                                                                                                                                                                                                   |
| Alcohol Use / Abuse  | ICD-9-D-30390, ICD-9-D-30500, ICD-9-D-30501, ICD-9-D-30502, ICD-9-D-30503, ICD-9-D-V113, ICD-10-D-F1021, ICD-10-D-F10129, ICD-10-D-F1020, ICD-10-D-F1010                                                                                                                                                                                                                                                                                                          |
| Drug Abuse           | ICD-9-D-30590, ICD-9-D-30591, ICD-9-D-30592, ICD-9-D-30593, ICD-10-D-F1410, ICD-10-D-F1411, ICD-10-D-F1420, ICD-10-D-F1490, ICD-10-D-F1421, ICD-10-D-F1290, ICD-10-D-F1210, ICD-10-D-F1220, ICD-10-D-F1221, ICD-10-D-F1520, ICD-10-D-F1521, ICD-10-D-F1523                                                                                                                                                                                                        |
| Opioid Abuse         | ICD-9-D-30400, ICD-9-D-30401, ICD-9-D-30402, ICD-9-D-30403, ICD-10-D-F1120, ICD-10-D-F1190, ICD-10-D-F1110, ICD-10-D-F1123, ICD-10-D-F1121, ICD-10-D-F11288, ICD-9-D-30550, ICD-9-D-30551, ICD-9-D-30552, ICD-9-D-30553, ICD-10-D-F1111                                                                                                                                                                                                                           |
| Anxiety              | ICD-9-D-29384, ICD-9-D-30002, ICD-10-D-F419, ICD-10-D-F411                                                                                                                                                                                                                                                                                                                                                                                                        |
| Depression           | ICD-9-D-311, ICD-9-D-29620, ICD-9-D-29621, ICD-9-D-29622, ICD-9-D-29623, ICD-9-D-29624, ICD-9-D-29625, ICD-9-D-29626, ICD-9-D-29630, ICD-9-D-29631, ICD-9-D-29632, ICD-9-D-29633, ICD-9-D-29634, ICD-9-D-29635, ICD-9-D-29636, ICD-10-D-F339, ICD-10-D-F329, ICD-10-D-F330, ICD-10-D-F331, ICD-10-D-F332, ICD-10-D-F333, ICD-10-D-F3340, ICD-10-D-F3341, ICD-10-D-F3342, ICD-10-D-F320, ICD-10-D-F321, ICD-10-D-F322, ICD-10-D-F323, ICD-10-D-F324, ICD-10-D-F325 |
| Back Pain            | ICD-9-D-7242, ICD-10-D-M5440, ICD-10-D-M5441, ICD-10-D-M5442                                                                                                                                                                                                                                                                                                                                                                                                      |
| Chronic Pain         | ICD-9-D-33829, ICD-9-D-3384, ICD-10-D-G8929, ICD-10-D-G894                                                                                                                                                                                                                                                                                                                                                                                                        |
| Fibromyalgia         | ICD-9-D-7291, ICD-10-D-M797                                                                                                                                                                                                                                                                                                                                                                                                                                       |

|                                  |                                                                                                                                                                                                                                                                           |
|----------------------------------|---------------------------------------------------------------------------------------------------------------------------------------------------------------------------------------------------------------------------------------------------------------------------|
| Migraine                         | ICD-9-D-34690, ICD-10-D-G43909                                                                                                                                                                                                                                            |
| Emergency Department Visit       | CPT-99281, CPT-99282, CPT-99283, CPT-99284, CPT-99285                                                                                                                                                                                                                     |
| <b>Complications</b>             |                                                                                                                                                                                                                                                                           |
| Phantom Limb Pain                | ICD-9-D-3536, ICD-10-D-G546, ICD-10-D-G547                                                                                                                                                                                                                                |
| Amputation Stump Complications   | ICD-9-D-99760, ICD-9-D-99761, ICD-9-D-99762, ICD-9-D-99769, ICD-10-D-T8740, ICD-10-D-T8741, ICD-10-D-T8742, ICD-10-D-T8743, ICD-10-D-T8744, ICD-10-D-T8750, ICD-10-D-T8751, ICD-10-D-T8752, ICD-10-D-T8753, ICD-10-D-T8754, ICD-10-D-T8781, ICD-10-D-T8789, ICD-10-D-T879 |
| Amputation Neuroma               | ICD-9-D-99761, ICD-10-D-T8730, ICD-10-D-T8731, ICD-10-D-T8732, ICD-10-D-T8733, ICD-10-D-T8734                                                                                                                                                                             |
| Amputation Neuritis or Neuralgia | ICD-9-D-7292, ICD-10-D-M792                                                                                                                                                                                                                                               |

---

CPT: Current Procedural Terminology; ICD-9: International Classification of Diseases, Ninth Revision; ICD-10: International Classification of Diseases, Tenth Revision; Uniform System of Classification of Prescription Drugs

---
